# Supplementary material
Source: publisher site journal article supplement (https://static.cambridge.org/content/id/urn:cambridge.org:id:article:S0090599219001302/resource/name/S0090599219001302supp001.docx)
Supplement: Supplementary file 1 [file S0090599219001302supp001.docx]

<LE>Figure A1. Nationalist rhetoric and issue saliency in the Russian and Ukrainian media.</LE>
